# Supplementary material for: Antiviral Activity of Flavonoids from Geopropolis of the Brazilian Jandaira Bee against Zika and Dengue Viruses
Source: MDPI journal article supplement (doi:10.3390/pharmaceutics15102494), 2023-10-19
Supplement: s1 [file s1]

# Antiviral Activity of flavonoids from Geopropolis of the Brazilian Jandaira bee against Zika and dengue viruses

Poliana Gomes da Silva<sup>1</sup>, Elton José Ferreira Chaves<sup>1</sup>, Tania Maria Sarmiento Silva<sup>2</sup>, Gerd Bruno Rocha<sup>3</sup>, Willyenne Marília Dantas<sup>1,4</sup>, Ronaldo Nascimento de Oliveira<sup>4</sup> and Lindomar José Pena<sup>1\*</sup>.

<sup>1</sup> Laboratory of Virology and Experimental Therapy (LaviteLE) - Department of Virology, Aggeu Magalhães Institute (IAM), Oswaldo Cruz Foundation (Fiocruz), Recife, Pernambuco, Brazil; poligs250@gmail.com; chavesejf@cbiotec.ufpb.br

<sup>2</sup> Phytochemical Bioprospecting Laboratory, Department of Chemistry, Federal Rural University of Pernambuco, Recife, Pernambuco, Brazil; sarmentosilva@gmail.com

<sup>3</sup> Laboratory of Computational Quantum Chemistry, Department of Chemistry, Federal University of Paraíba, João Pessoa, Paraíba, Brazil. gbr@quimica.ufpb.br

<sup>4</sup> Bioactive Compounds Synthesis Laboratory, Department of Chemistry, Federal Rural University of Pernambuco (UFRPE), Recife, Brazil ronaldon38@gmail.com; dantaswillyenne@gmail.com

\* Correspondence: lindomar.pena@focruz.br; lindomarfocruz@gmail.com

**Keywords:** *Zika virus; dengue, antivirals; Naringenin; 7-O-methyl naringenin; Geopropolis; Molecular simulations.*

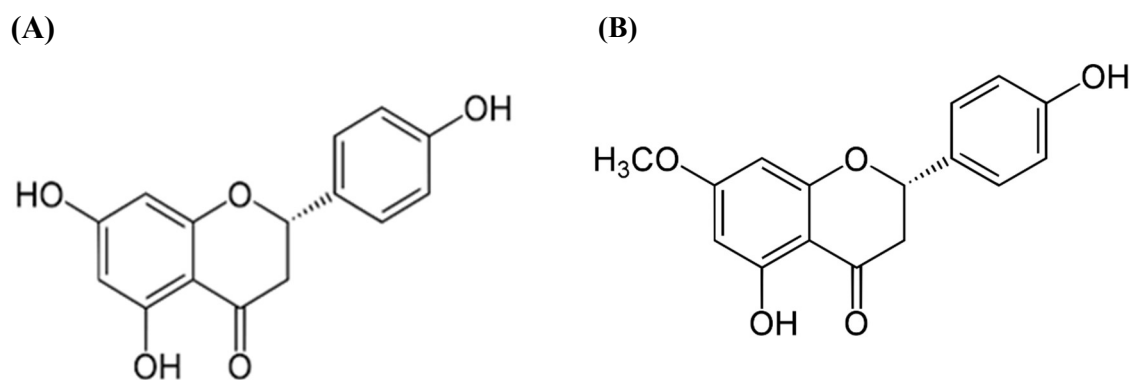

Figure S1. Chemical structure of the two tested flavonoids. Naringenin (A) and (B) 7-O-methyl naringenin.

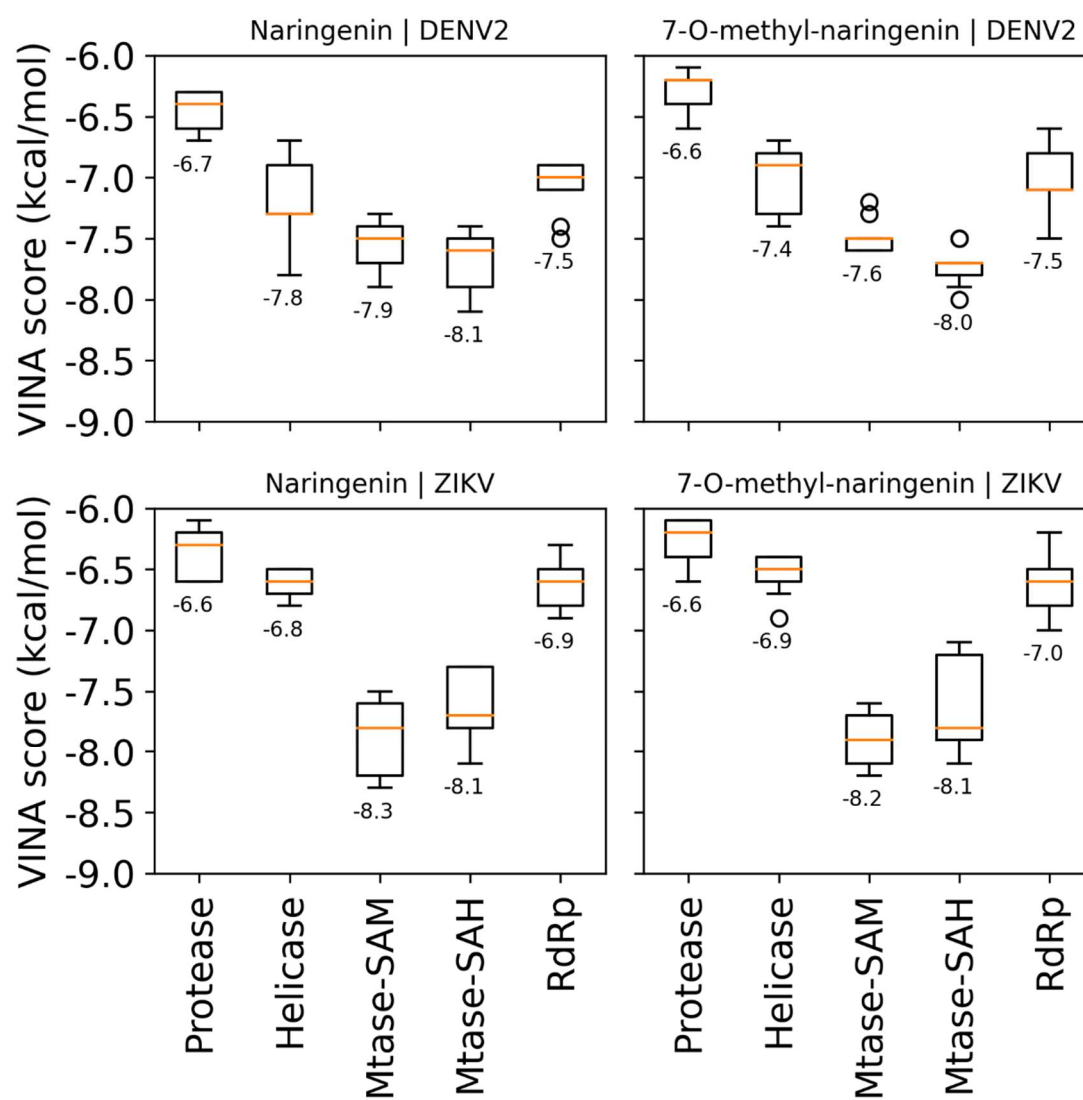

Figure S2. Docking scores obtained for the poses predicted by the Vina software.
